# Supplementary material for: Differential responses of the gut transcriptome to plant protein diets in farmed Atlantic salmon
Source: BMC Genomics. 2016 Feb 29;17:156. doi: 10.1186/s12864-016-2473-0 (PMC4772681; doi:10.1186/s12864-016-2473-0)
Supplement: Additional file 11: — Pathways ( n = 12) and contributing genes altered in distal gut of Atlantic salmon fed a diet with 45 % of bean protein concentrate (B 45 ). (XLSX 26 kb) [file 12864_2016_2473_MOESM11_ESM.xlsx]

## Sheet: Add file 11
Additional file 11
Pathways (n = 12) and contributing genes altered in distal gut of Atlantic salmon fed diet with 45% of bean protein concentrate (B45).
Ingenuity canonical pathway	Path order (sorted by significance)		Gene fold change (relative to FM diet), P<0.01 indicates pathway significance
Gene symbol	Gene name		B45	SBM	S45		S34B11	S22B22	S11B34
Germ Cell-Sertoli Cell Junction Signaling	1		P<0.01	P<0.01
CFL2	cofilin 2 (muscle)	.	7.97785
JUP	junction plakoglobin	.	1.80375
ITGA6	integrin, alpha 6	.	1.53688
ITGB1	integrin, beta 1 (fibronectin receptor, beta polypeptide, antigen CD29 includes MDF2, MSK12)	.	-1.60103
TNFRSF1A	tumor necrosis factor receptor superfamily, member 1A	.	-1.60882
IQGAP1	IQ motif containing GTPase activating protein 1	.	-1.65749	-1.56049			2.36854
CDH2	cadherin 2, type 1, N-cadherin (neuronal)	.	-1.70882
TUBA4A	tubulin, alpha 4a	.	-1.83401
TNF	tumor necrosis factor	.	-26.2273	-4.55673
PIK3CA	phosphatidylinositol-4,5-bisphosphate 3-kinase, catalytic subunit alpha	.		-1.70882
TUBB3	Tubulin beta-3 chain	.		1.54221
TUBB4B	tubulin, beta 4B class IVb	.		1.61608
RAC1	ras-related C3 botulinum toxin substrate 1 (rho family, small GTP binding protein Rac1)	.		1.81693
MAP3K5	mitogen-activated protein kinase kinase kinase 5	.		5.92576
TUBB	tubulin, beta class I	.		1.5003
GSN	gelsolin	.		4.95539
MAPK10	mitogen-activated protein kinase 10	.		-4.60117
TUBA3D	tubulin, alpha 3d	.		1.92652
MTMR2	myotubularin related protein 2	.		2.18556
TUBA1C	tubulin, alpha 1c	.		1.62338
TUBB4A	tubulin, beta 4A class IVa	.		1.44193
ATM	ataxia telangiectasia mutated	.		2.464
		.
Role of Tissue Factor in Cancer	2	.	P<0.01
CFL2	cofilin 2 (muscle)	.	7.97785
ARRB2	arrestin, beta 2	.	1.9711
ITGA6	integrin, alpha 6	.	1.53688
ITGB3	integrin, beta 3 (platelet glycoprotein IIIa, antigen CD61)	.	1.48144	1.47121
ITGB1	integrin, beta 1 (fibronectin receptor, beta polypeptide, antigen CD29 includes MDF2, MSK12)	.	-1.60103
F3	coagulation factor III (thromboplastin, tissue factor)	.	-1.70173
MMP13	matrix metallopeptidase 13 (collagenase 3)	.	-1.94127		-2.36199		-2.18758		-2.42447
PTEN	phosphatase and tensin homolog	.			-1.55401
PIK3CA	phosphatidylinositol-4,5-bisphosphate 3-kinase, catalytic subunit alpha	.		-1.70882
CSF1	colony stimulating factor 1 (macrophage)	.		5.8604
RAC1	ras-related C3 botulinum toxin substrate 1 (rho family, small GTP binding protein Rac1)	.		1.81693
GNAQ	guanine nucleotide binding protein (G protein), q polypeptide	.		2.92209
EIF4E	eukaryotic translation initiation factor 4E	.		1.60464
ATM	ataxia telangiectasia mutated	.		2.464
		.
ILK Signaling	3	.	P<0.01	P<0.01
FOS	FBJ murine osteosarcoma viral oncogene homolog	.	10.6221
CFL2	cofilin 2 (muscle)	.	7.97785
PPP2R5E	protein phosphatase 2, regulatory subunit B', epsilon isoform	.	1.70764
FBLIM1	filamin binding LIM protein 1	.	1.69349
ITGB3	integrin, beta 3 (platelet glycoprotein IIIa, antigen CD61)	.	1.48144	1.47121
ITGB1	integrin, beta 1 (fibronectin receptor, beta polypeptide, antigen CD29 includes MDF2, MSK12)	.	-1.60103
ATF4	activating transcription factor 4	.	-1.60103	-1.42603					-1.55401
TNFRSF1A	tumor necrosis factor receptor superfamily, member 1A	.	-1.60882
TNF	tumor necrosis factor	.	-26.2273	-4.55673
JUN	jun proto-oncogene	.			-1.69819
CREB1	cAMP responsive element binding protein 1	.			14.43				-18.3792
PTEN	phosphatase and tensin homolog	.			-1.55401
PIK3CA	phosphatidylinositol-4,5-bisphosphate 3-kinase, catalytic subunit alpha	.		-1.70882
MYH9	myosin, heavy chain 9, non-muscle	.		1.47939
PPP2CA	protein phosphatase 2, catalytic subunit, alpha isozyme	.		3.2065
CREBBP	CREB binding protein	.		-1.88035
MYH7	myosin, heavy chain 7, cardiac muscle, beta	.		-3.47256
NFKB2	nuclear factor of kappa light polypeptide gene enhancer in B-cells 2 (p49/p100)	.		5.65293
CCND1	cyclin D1	.		-1.76418
PARVB	parvin, beta	.		-1.81504
TGFB1I1	transforming growth factor beta 1 induced transcript 1	.		-5.77972
MAPK10	mitogen-activated protein kinase 10	.		-4.60117
NOS2	nitric oxide synthase 2, inducible	.		4.54727
TMSB10	thymosin beta 10	.		2.09072
ATM	ataxia telangiectasia mutated	.		2.464
		.
Granulocyte Adhesion and Diapedesis	4	.	P<0.01
SDC4	syndecan 4	.	2.27837
MMP20	matrix metallopeptidase 20	.	2.12505	2.32463
ITGA6	integrin, alpha 6	.	1.53688
ITGB3	integrin, beta 3 (platelet glycoprotein IIIa, antigen CD61)	.	1.48144	1.47121
ITGB1	integrin, beta 1 (fibronectin receptor, beta polypeptide, antigen CD29 includes MDF2, MSK12)	.	-1.60103
TNFRSF1A	tumor necrosis factor receptor superfamily, member 1A	.	-1.60882
MMP13	matrix metallopeptidase 13 (collagenase 3)	.	-1.94127		-2.36199		-2.18758		-2.42447
TNF	tumor necrosis factor	.	-26.2273	-4.55673
GNAI2	guanine nucleotide binding protein (G protein), alpha inhibiting activity polypeptide 2	.		-2.53034			-2.3473	-2.65737	-2.43344
VCAM1	vascular cell adhesion molecule 1	.		-5.49454
SDC2	syndecan 2	.		1.6888
CCL20	chemokine (C-C motif) ligand 20	.		1.64262
IL1R1	interleukin 1 receptor, type I	.		2.27995
CXCL2	chemokine (C-X-C motif) ligand 2	.		-3.76591
CLDN4	claudin 4	.						20.4354
		.
PXR/RXR Activation	5	.	P<0.01	P<0.01
G6PC	glucose-6-phosphatase, catalytic subunit	.	2.73397		3.10588		3.16017		2.62624
CYP2A7	cytochrome P450, family 2, subfamily A, polypeptide 7	.	2.25324		2.26106
ALAS1	aminolevulinate, delta-, synthase 1	.	1.89343	1.90957	-2.0167
HNF4A	hepatocyte nuclear factor 4, alpha	.	1.67714
TNF	tumor necrosis factor	.	-26.2273	-4.55673
PRKACB	protein kinase, cAMP-dependent, catalytic, beta	.		3.24001
SCD	stearoyl-CoA desaturase (delta-9-desaturase)	.		1.79502
CES2	carboxylesterase 2	.		-1.64718
INSR	insulin receptor	.		-1.90924
ABCB9	ATP-binding cassette, sub-family B (MDR/TAP), member 9	.		-1.88296
		.
Caveolar-mediated Endocytosis Signaling	6	.	P<0.01
COPA	coatomer protein complex, subunit alpha	.	2.31498
COPB1	coatomer protein complex, subunit beta 1	.	2.19314
ITGA6	integrin, alpha 6	.	1.53688
ITGB3	integrin, beta 3 (platelet glycoprotein IIIa, antigen CD61)	.	1.48144	1.47121
ITGB1	integrin, beta 1 (fibronectin receptor, beta polypeptide, antigen CD29 includes MDF2, MSK12)	.	-1.60103
HLA-A	major histocompatibility complex, class I, A	.		1.78262
ABL1	c-abl oncogene 1, non-receptor tyrosine kinase	.		-12.8616
INSR	insulin receptor	.		-1.90924
		.
Tight Junction Signaling	7	.	P<0.01
FOS	FBJ murine osteosarcoma viral oncogene homolog	.	10.6221
PPP2R5E	protein phosphatase 2, regulatory subunit B', epsilon isoform	.	1.70764
OCLN	occludin	.	1.6144	1.65749
MYLK	myosin light chain kinase	.	1.58557
TNFRSF1A	tumor necrosis factor receptor superfamily, member 1A	.	-1.60882
MPP5	membrane protein, palmitoylated 5 (MAGUK p55 subfamily member 5)	.	-11.3609		-8.73011		-7.92274		-10.4977
TNF	tumor necrosis factor	.	-26.2273	-4.55673
JUN	jun proto-oncogene	.			-1.69819
PTEN	phosphatase and tensin homolog	.			-1.55401
PRKACB	protein kinase, cAMP-dependent, catalytic, beta	.		3.24001
MYH9	myosin, heavy chain 9, non-muscle	.		1.47939
PPP2CA	protein phosphatase 2, catalytic subunit, alpha isozyme	.		3.2065
RAC1	ras-related C3 botulinum toxin substrate 1 (rho family, small GTP binding protein Rac1)	.		1.81693
CPSF3	cleavage and polyadenylation specific factor 3, 73kDa	.		1.6529
MYH7	myosin, heavy chain 7, cardiac muscle, beta	.		-3.47256
NFKB2	nuclear factor of kappa light polypeptide gene enhancer in B-cells 2 (p49/p100)	.		5.65293
CLDN4	claudin 4	.						20.4354
		.
Bupropion Degradation	8	.	P<0.01		P<0.01		P<0.01
CYP2A7	cytochrome P450, family 2, subfamily A, polypeptide 7	.	2.25324		2.26106
CYP1A1	cytochrome P450, family 1, subfamily A, polypeptide 1	.	1.76786	-1.66728					1.84506
CYP2U1	cytochrome P450, family 2, subfamily U, polypeptide 1	.	1.49381
CYP2F1	cytochrome P450, family 2, subfamily F, polypeptide 1	.		-1.78633	1.56808		1.57352
CYP51A1	cytochrome P450, family 51, subfamily A, polypeptide 1	.		2.6217	3.06524		2.27837
CYP2J2	cytochrome P450, family 2, subfamily J, polypeptide 2	.		1.78757
		.
Acetone Degradation I (to Methylglyoxal)	9	.	P<0.01		P<0.01		P<0.01
CYP2A7	cytochrome P450, family 2, subfamily A, polypeptide 7	.	2.25324		2.26106
CYP1A1	cytochrome P450, family 1, subfamily A, polypeptide 1	.	1.76786	-1.66728					1.84506
CYP2U1	cytochrome P450, family 2, subfamily U, polypeptide 1	.	1.49381
CYP2F1	cytochrome P450, family 2, subfamily F, polypeptide 1	.		-1.78633	1.56808		1.57352
CYP51A1	cytochrome P450, family 51, subfamily A, polypeptide 1	.		2.6217	3.06524		2.27837
CYP2J2	cytochrome P450, family 2, subfamily J, polypeptide 2	.		1.78757
		.
Clathrin-mediated Endocytosis Signaling	10	.	P<0.01	P<0.01
DAB2	Dab, mitogen-responsive phosphoprotein, homolog 2 (Drosophila)	.	2.82451	-1.50838
ARRB2	arrestin, beta 2	.	1.9711
HSPA8	heat shock 70kDa protein 8	.	1.94801	1.67675
APOA4	apolipoprotein A-IV	.	1.8908
ITGB3	integrin, beta 3 (platelet glycoprotein IIIa, antigen CD61)	.	1.48144	1.47121
FGF2	fibroblast growth factor 2 (basic)	.	-1.47325
ITGB1	integrin, beta 1 (fibronectin receptor, beta polypeptide, antigen CD29 includes MDF2, MSK12)	.	-1.60103
ACTR2	ARP2 actin-related protein 2 homolog (yeast)	.		1.78757
AP2M1	adaptor-related protein complex 2, mu 1 subunit	.		1.41421
PIK3CA	phosphatidylinositol-4,5-bisphosphate 3-kinase, catalytic subunit alpha	.		-1.70882
SH3BP4	SH3-domain binding protein 4	.		-8.08922
APOA2	apolipoprotein A-II	.		-1.88557
CLTC	clathrin, heavy chain (Hc)	.		7.48499
RAC1	ras-related C3 botulinum toxin substrate 1 (rho family, small GTP binding protein Rac1)	.		1.81693
ACTR3	ARP3 actin-related protein 3 homolog (yeast)	.		1.49589
ARPC1A	actin related protein 2/3 complex, subunit 1A, 41kDa	.		1.42306
TF	transferrin	.		-5.89708
RAB11B	RAB11B, member RAS oncogene family	.		1.60993
RAB11A	RAB11A, member RAS oncogene family	.		2.09217
UBC	ubiquitin C	.		1.54578
ATM	ataxia telangiectasia mutated	.		2.464
		.
Agranulocyte Adhesion and Diapedesis	11	.	P<0.01
SDC4	syndecan 4	.	2.27837
MMP20	matrix metallopeptidase 20	.	2.12505	2.32463
ITGA6	integrin, alpha 6	.	1.53688
ITGB1	integrin, beta 1 (fibronectin receptor, beta polypeptide, antigen CD29 includes MDF2, MSK12)	.	-1.60103
TNFRSF1A	tumor necrosis factor receptor superfamily, member 1A	.	-1.60882
MMP13	matrix metallopeptidase 13 (collagenase 3)	.	-1.94127		-2.36199		-2.18758		-2.42447
TNF	tumor necrosis factor	.	-26.2273	-4.55673
GNAI2	guanine nucleotide binding protein (G protein), alpha inhibiting activity polypeptide 2	.		-2.53034			-2.3473	-2.65737	-2.43344
VCAM1	vascular cell adhesion molecule 1	.		-5.49454
MYH9	myosin, heavy chain 9, non-muscle	.		1.47939
CCL20	chemokine (C-C motif) ligand 20	.		1.64262
MYH7	myosin, heavy chain 7, cardiac muscle, beta	.		-3.47256
IL1R1	interleukin 1 receptor, type I	.		2.27995
CXCL2	chemokine (C-X-C motif) ligand 2	.		-3.76591
CLDN4	claudin 4	.						20.4354
		.
HIF1α Signaling	12	.	P<0.01
RBX1	ring-box 1, E3 ubiquitin protein ligase	.	2.20687					2.83628
MMP20	matrix metallopeptidase 20	.	2.12505	2.32463
LDHB	lactate dehydrogenase B	.	1.64035
MMP13	matrix metallopeptidase 13 (collagenase 3)	.	-1.94127		-2.36199		-2.18758		-2.42447
SLC2A5	solute carrier family 2 (facilitated glucose/fructose transporter), member 5	.	-2.7198	-1.65979					-1.73508
JUN	jun proto-oncogene	.			-1.69819
EGLN3	egl-9 family hypoxia-inducible factor 3	.			-1.94733		-1.96973
PIK3CA	phosphatidylinositol-4,5-bisphosphate 3-kinase, catalytic subunit alpha	.		-1.70882
CREBBP	CREB binding protein	.		-1.88035
MAPK10	mitogen-activated protein kinase 10	.		-4.60117
NOS2	nitric oxide synthase 2, inducible	.		4.54727
ATM	ataxia telangiectasia mutated	.		2.464
